# Supplementary material for: Posture similarity index: a method to compare hand postures in synergy space
Source: PeerJ journal article supplement (doi:10.7717/peerj.6078), 2018-12-10

## Internally constrained hand postures

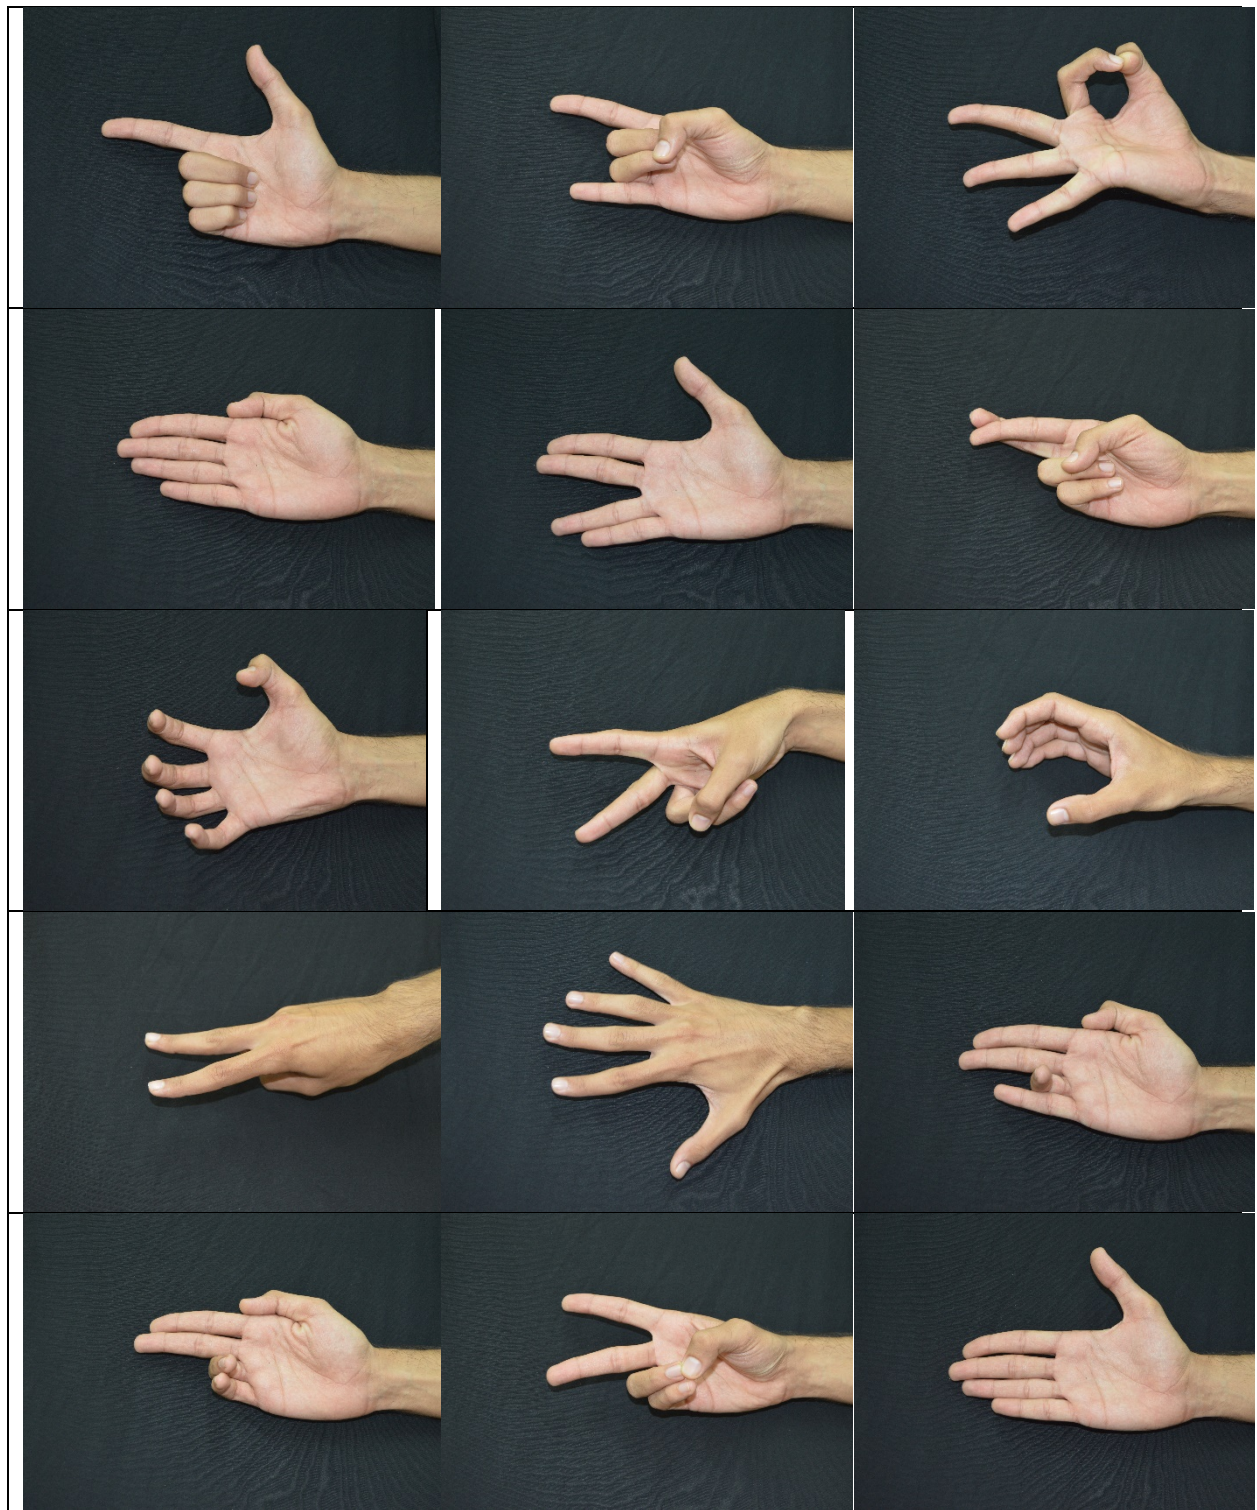



## Continued

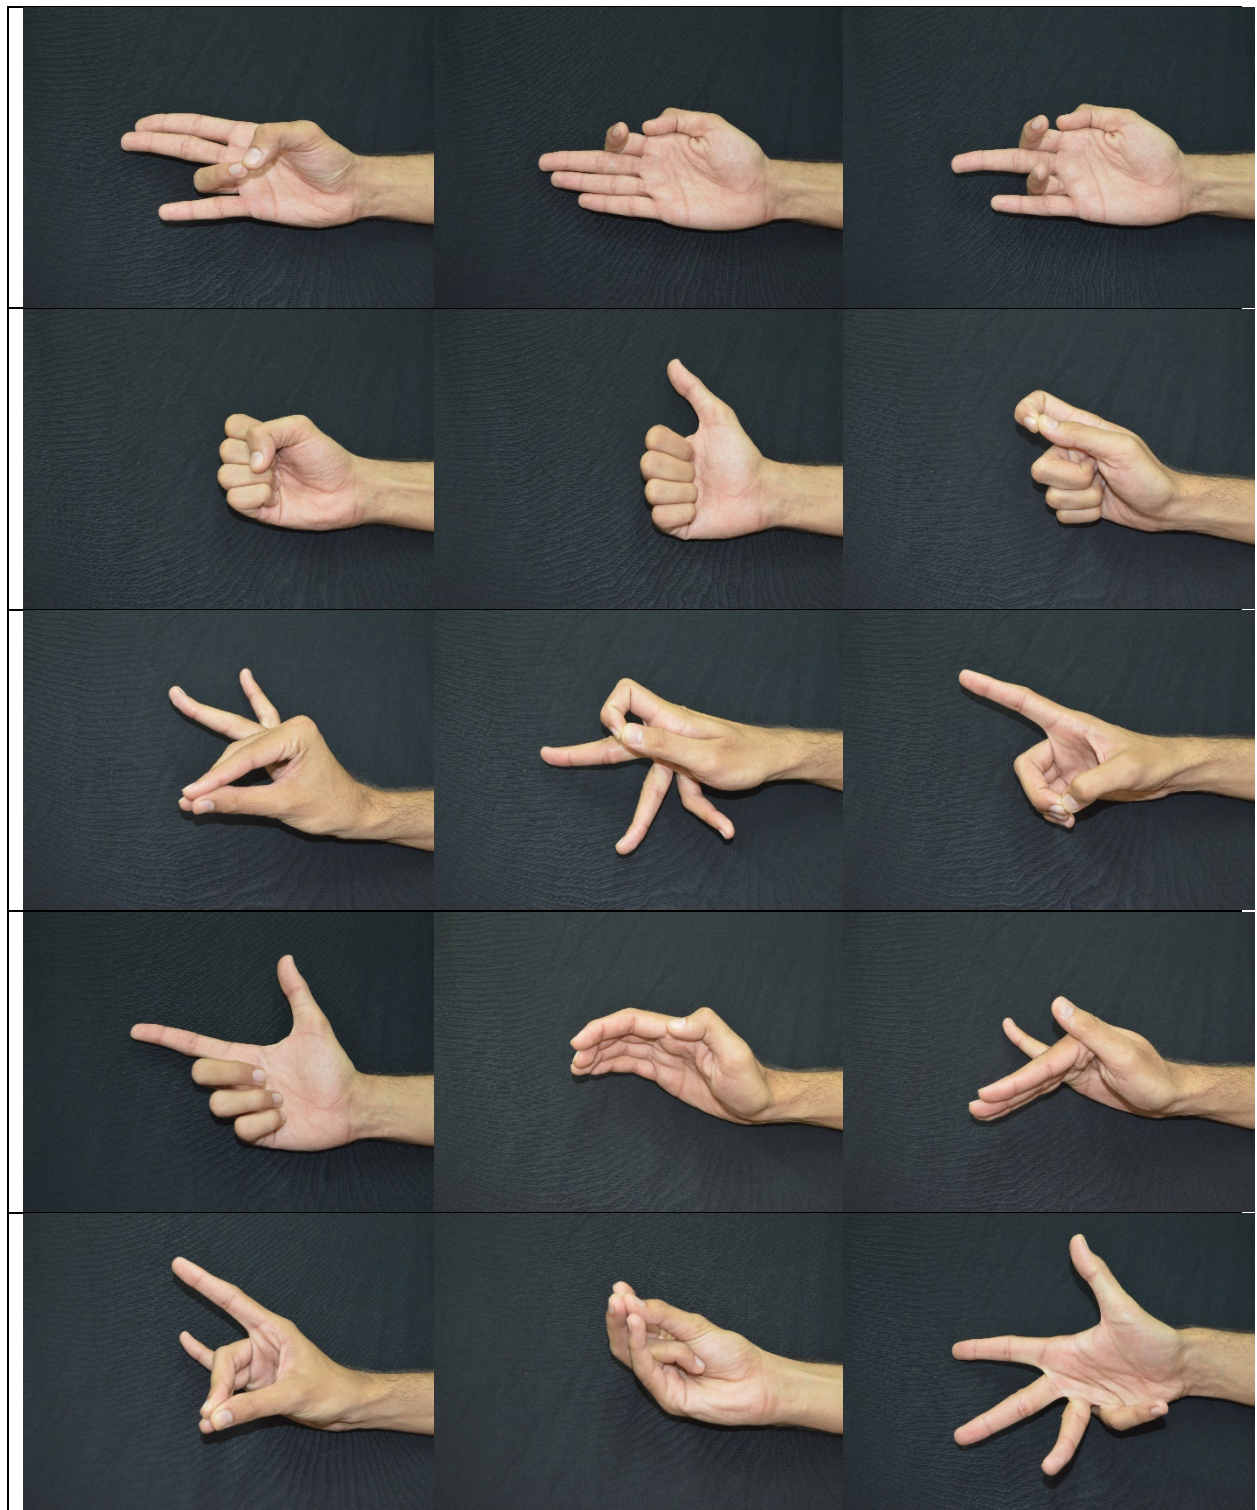



## Continued

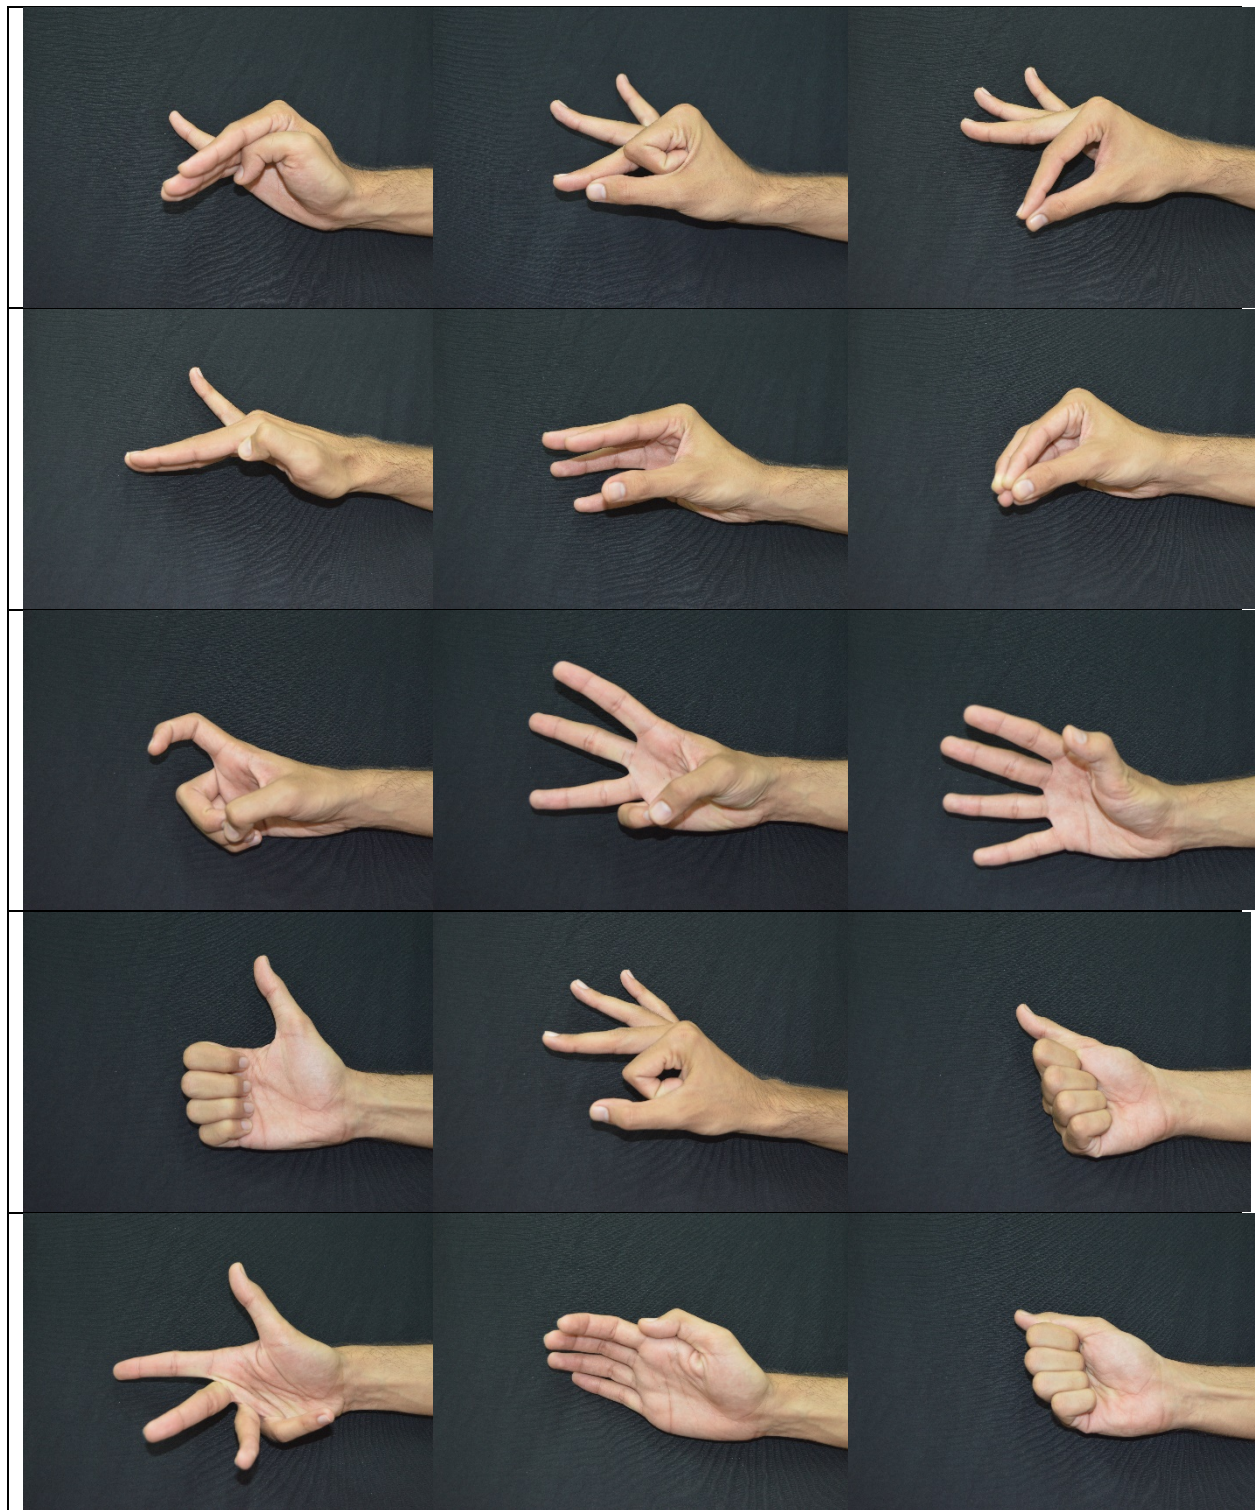



## Continued

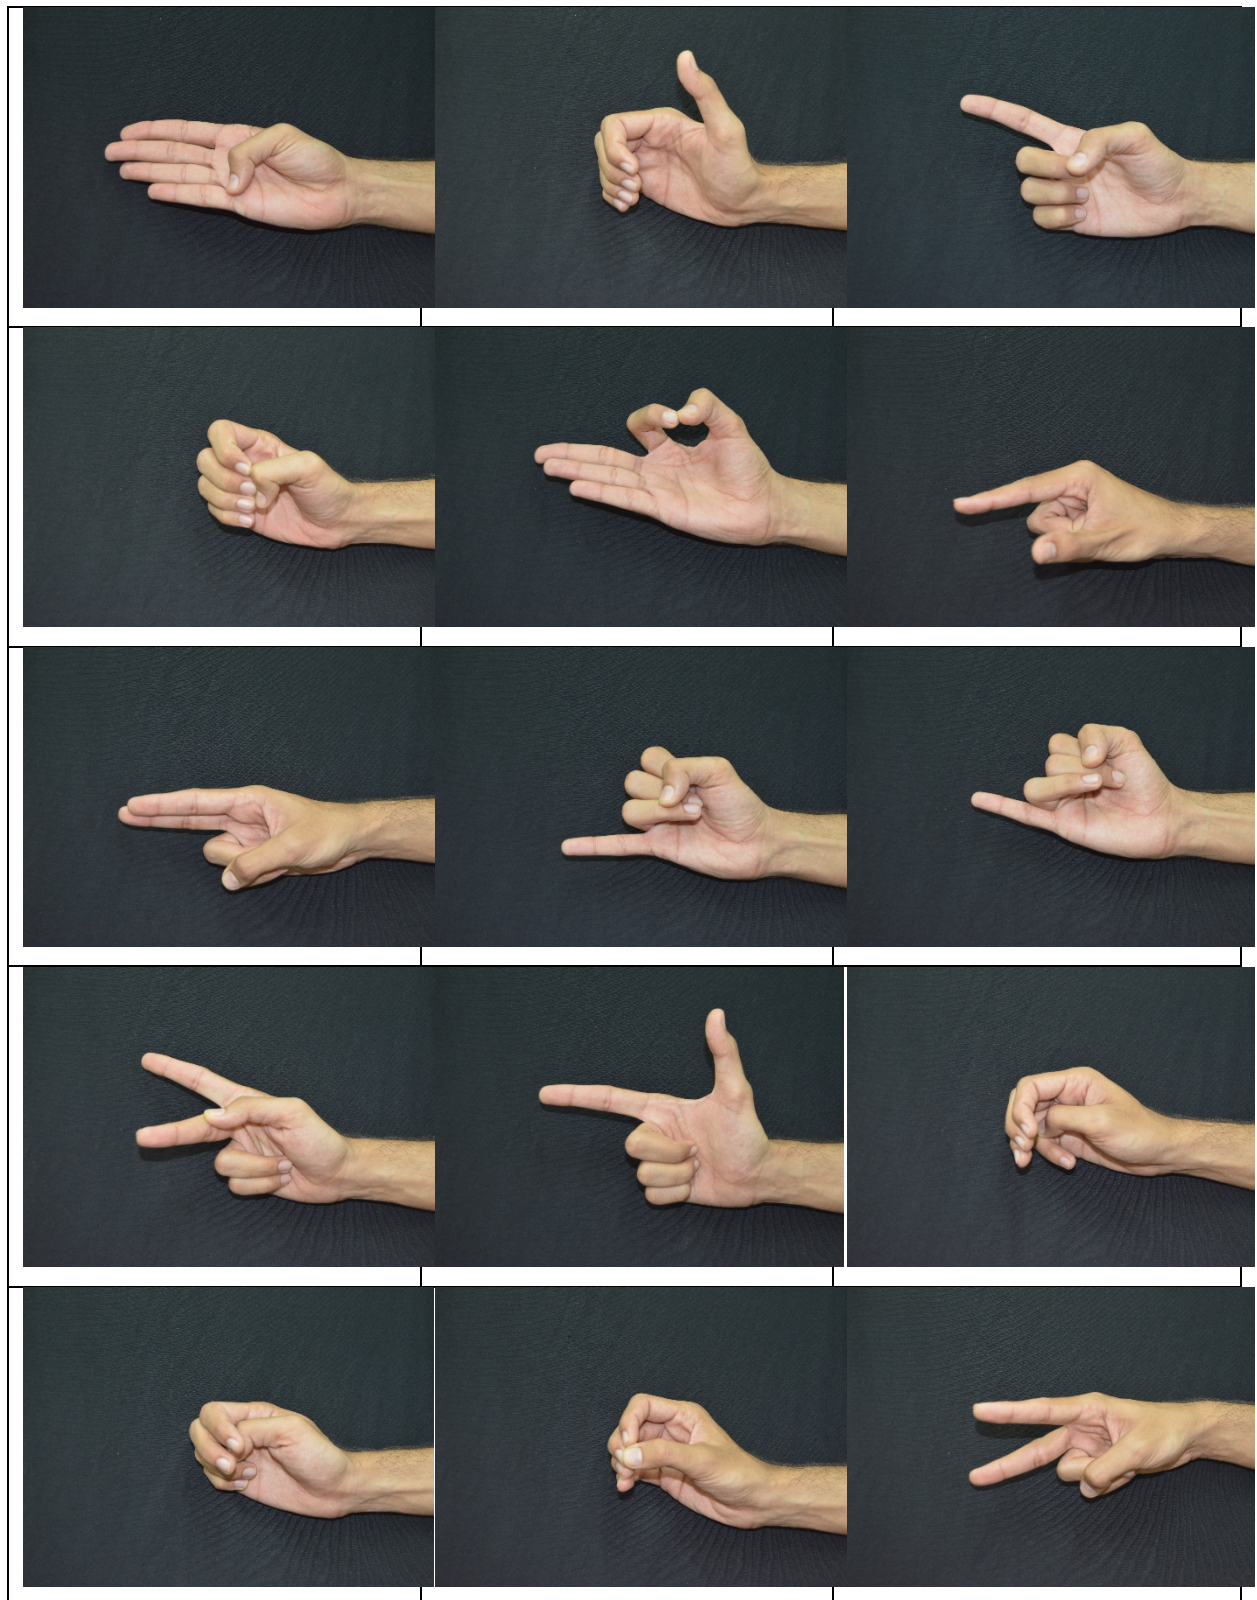

## Continued

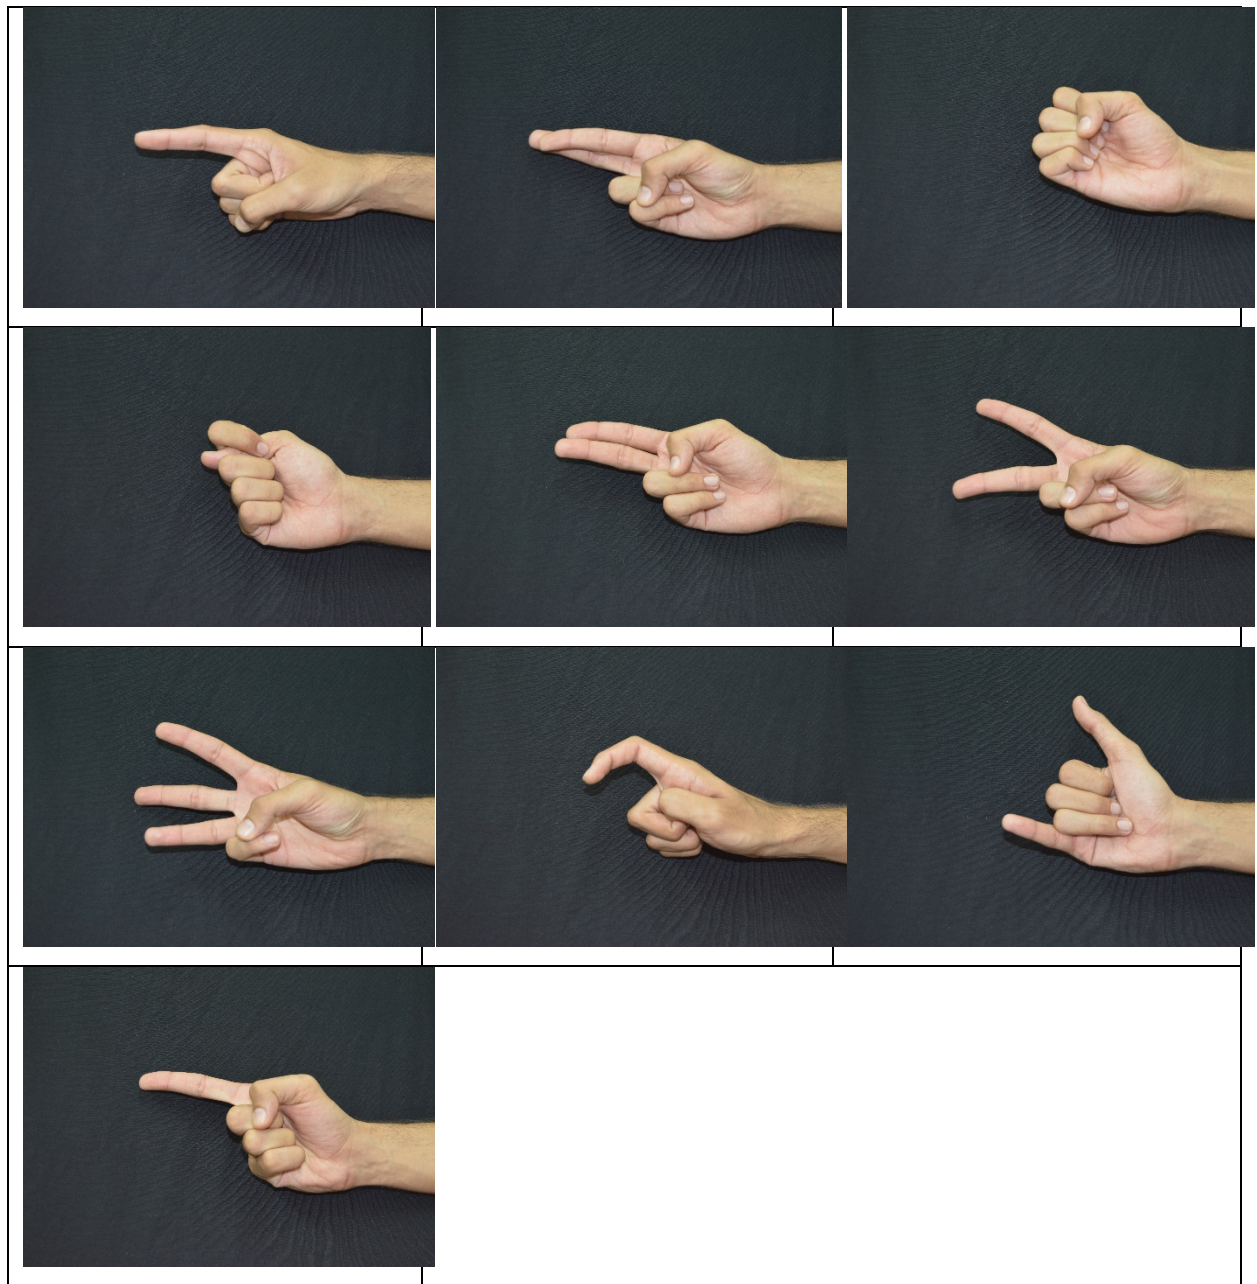



**Externally constrained hand postures:**

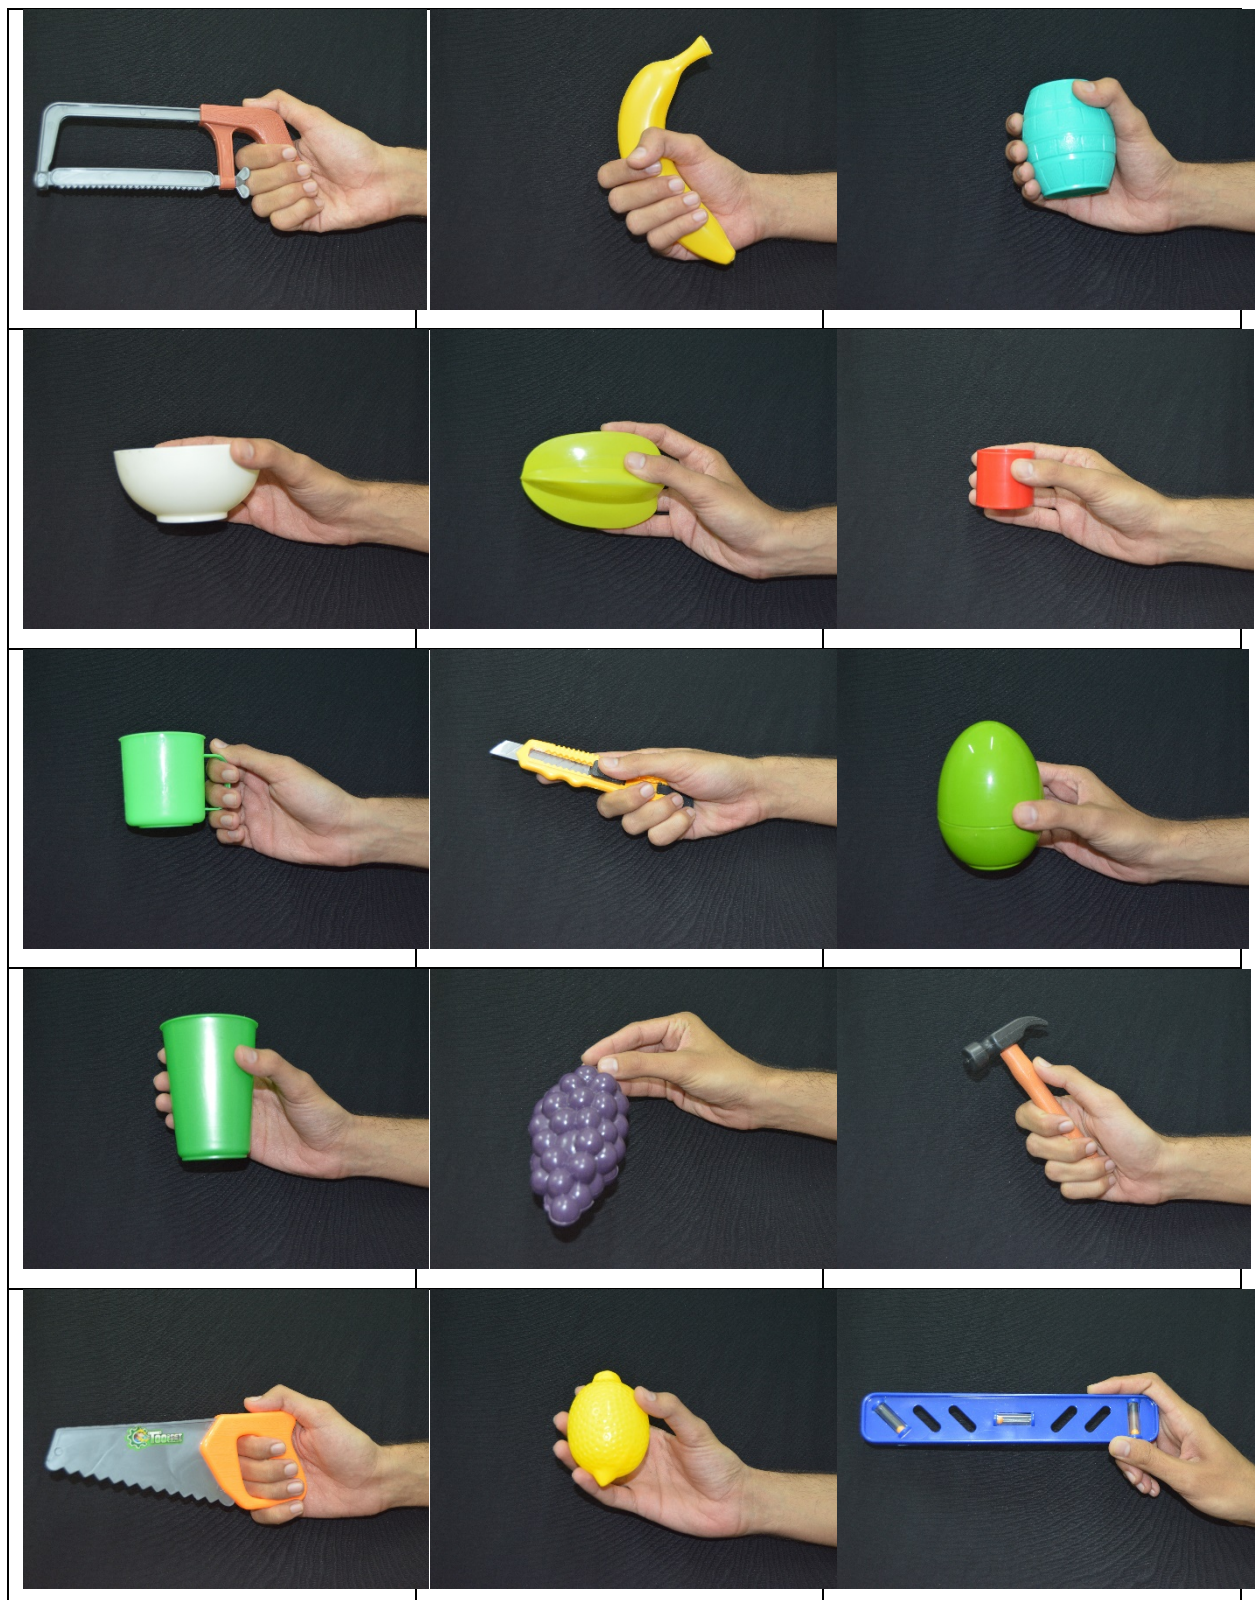



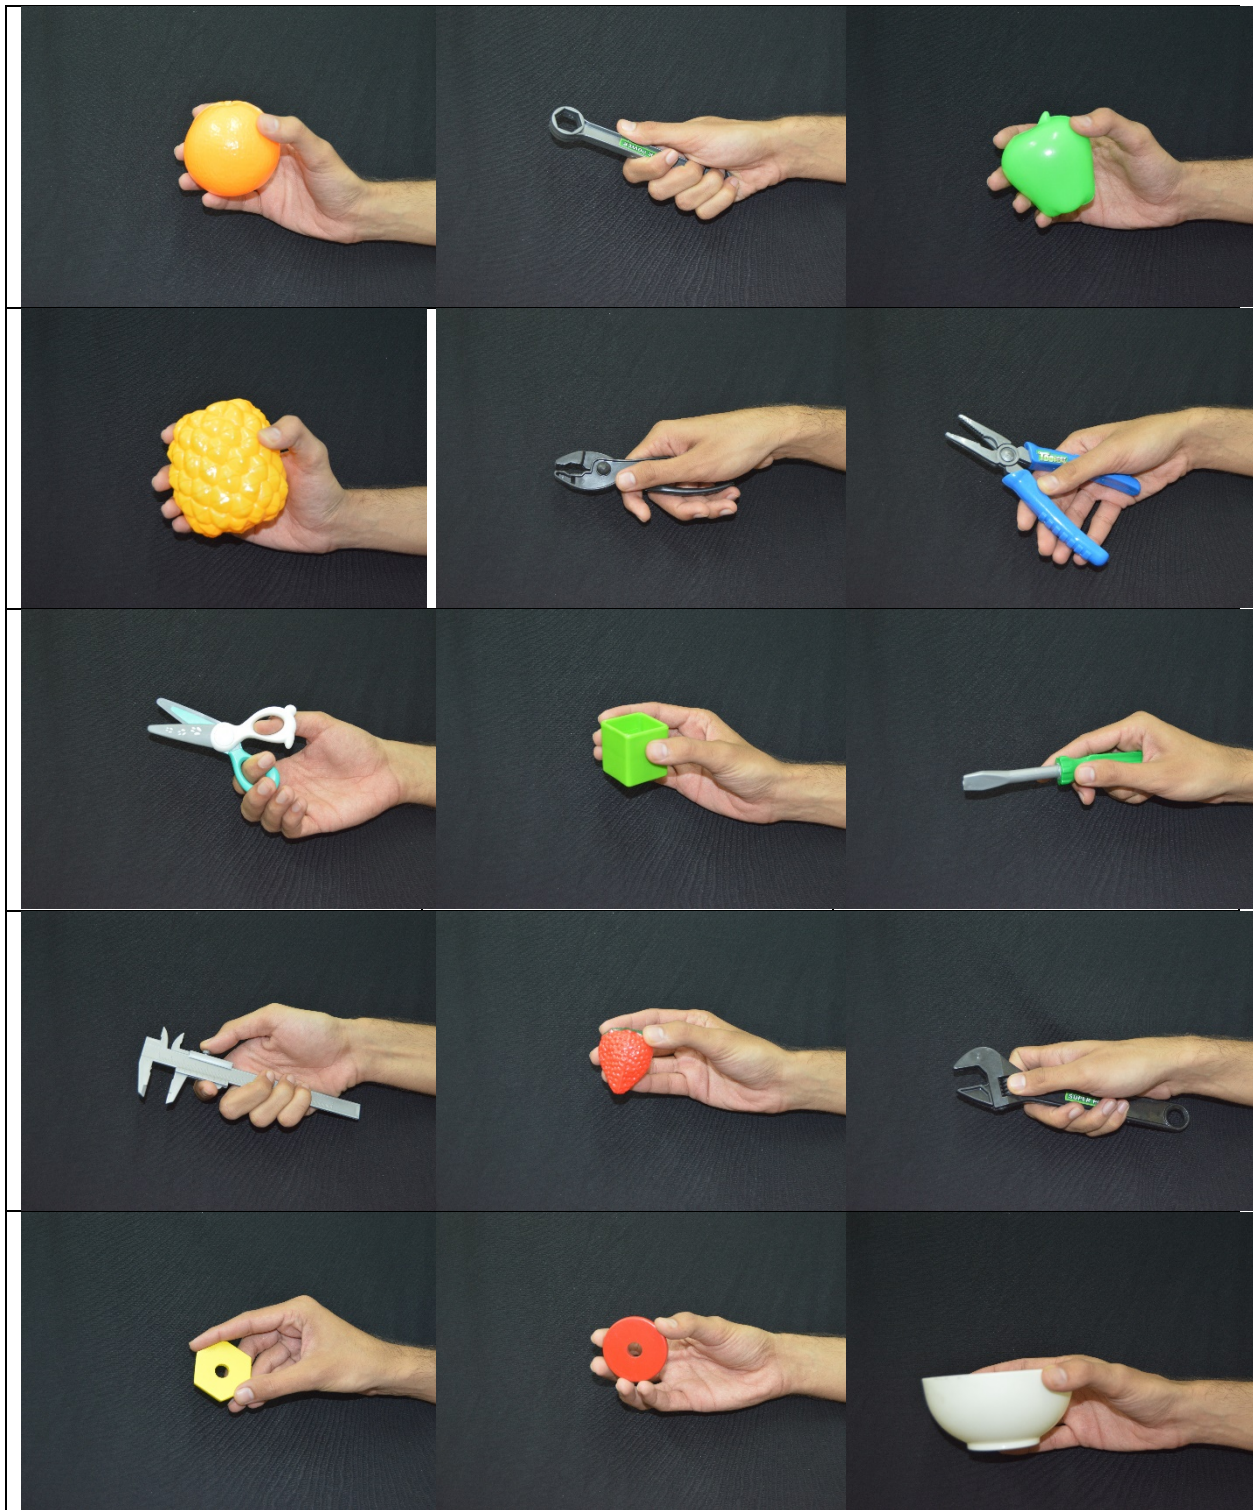

Supplement: Bhatt_SKM_Supplementary_material_HandPostures.pdf [file Bhatt_SKM_Supplementary_material_HandPostures.pdf]
